# Supplementary material for: Identifying post-marital residence patterns in prehistory: A phylogenetic comparative analysis of dwelling size
Source: PLoS One. 2020 Feb 24;15(2):e0229363. doi: 10.1371/journal.pone.0229363 (PMC7039508; doi:10.1371/journal.pone.0229363)
Supplement: S1 Table — (XLSX) [file pone.0229363.s002.xlsx]

## Sheet: List1
Model	Log-likelihood	Likelihood ratio	p-value	AIC	wAIC
Independent	-93.48	-	-	196.99	0.005
Both dep.	-86.67	15.64	0.003	189.34	0.264
AHFA dep.	-89.73	9.51	0.008	191.47	0.091
PMR dep.	-87.79	13.40	0.001	187.58	0.637
